# Supplementary material for: Attachment- and Relationship-Based Interventions during NICU Hospitalization for Families with Preterm/Low-Birth Weight Infants: A Systematic Review of RCT Data
Source: MDPI journal article supplement (doi:10.3390/ijerph19031126), 2022-01-20
Supplement: s1 [file s1]

Supp1.

Table S1. Intervention components, coded categories, and attachment/relationship, parental psycho-social, and infant outcomes (N = 15).

| First Author<br>(Year)             | Name of<br>Intervention                                            | Who<br>Delivered  | Duration/<br>Number of<br>Sessions | Control or<br>Comparison<br>Group | Intervention Components          |                     |    | Attachment/<br>Relationship<br>Outcomes                      | Parental<br>Psychosocial<br>Outcomes                                                                                                            | Infant<br>health<br>outcomes                                                                 |  |
|------------------------------------|--------------------------------------------------------------------|-------------------|------------------------------------|-----------------------------------|----------------------------------|---------------------|----|--------------------------------------------------------------|-------------------------------------------------------------------------------------------------------------------------------------------------|----------------------------------------------------------------------------------------------|--|
|                                    |                                                                    |                   |                                    |                                   | Parent-<br>Infant<br>Interaction | Parent<br>Education |    |                                                              | Suppo<br>rt                                                                                                                                     |                                                                                              |  |
|                                    |                                                                    |                   |                                    |                                   |                                  | E1                  | E2 | E3                                                           |                                                                                                                                                 |                                                                                              |  |
|                                    |                                                                    |                   |                                    |                                   |                                  |                     |    |                                                              |                                                                                                                                                 |                                                                                              |  |
| Melnyk et al.<br>(2001)[19]        | Creating<br>Opportuniti<br>es for Parent<br>Empowerm<br>ent (COPE) | n.a.              | 4-phase<br><br>(6-month)           | 4-phase<br>compariso<br>n program | +                                | +                   | +  | -<br><br>(maternal-<br>infant<br>interaction<br>scale /MIIS) | -<br><br>(state<br>anxiety/STAI;<br><br>negative mood<br>state/POMS);<br><br>+ (sights and<br>sounds stress<br>related to<br>NICU/PSS:NIC<br>U) | 3 & 6<br>months’<br>corrected<br>age +<br><br>(Infant<br>cognitive<br>developme<br>nt / MDI) |  |
| Ramanathan<br>et al.<br>(2001)[20] | Kangaroo<br>Mother Care<br>(KMC)                                   | Mother &<br>nurse | 4 hours/day                        | Standard<br>care                  | +                                |                     |    | n.a.                                                         | 6-week<br>follow-<br>up +<br><br>(no. of infants                                                                                                | +<br><br>(weight<br>gain;                                                                    |  |

|                               |     |                                                                    |                   |                       |                            |   |   |   |      | exclusively<br>breastfeeding)                                                                                      | age at<br>hospital<br>discharge)                                                                                               |
|-------------------------------|-----|--------------------------------------------------------------------|-------------------|-----------------------|----------------------------|---|---|---|------|--------------------------------------------------------------------------------------------------------------------|--------------------------------------------------------------------------------------------------------------------------------|
| Browne<br>Talmi<br>(2005)[17] | &   | G1<br>(Demonstration<br>&<br>Interaction)<br><br>G2<br>(Education) | n.a.              | 45 minutes            | Informal<br><br>discussion | + | + | + | +    | 1 month after<br>discharge G1 &<br>G2 < control +<br>(stress related to<br>parent and child<br>rearing/PSI)<br>FS) | n.a.                                                                                                                           |
| Lai et<br>(2006)[21]          | al. | Music<br>during<br>Kangaroo<br>care                                | Mother &<br>nurse | 60 minutes,<br>3 days | Routine<br>care            | + |   |   | n.a. | +                                                                                                                  | -<br><br>(maternal state<br>anxiety/STAI)<br><br>+<br><br>(behavioral<br>state: quiet<br>sleep,<br>crying,<br>active<br>awake) |

|                                  |                                          |                                     |                                  |                         |   |   |   |   |   |   |                                       |                                                                                                                                                                                                                                                   |      |
|----------------------------------|------------------------------------------|-------------------------------------|----------------------------------|-------------------------|---|---|---|---|---|---|---------------------------------------|---------------------------------------------------------------------------------------------------------------------------------------------------------------------------------------------------------------------------------------------------|------|
| Miles et al. (2006)[22]          | mother-infant Skin-to-Skin contact (STS) | Mother & nurse                      | 20 minutes/day, 4 weeks          | Standard care           | + |   |   |   |   | - | (parent to infant attachment /MPAS)   | - (maternal stress/PSS:NIC U; Perception of own caregiving confidence/MA BS; Depressive symptoms/EPD S; Anxiety levels/STAI; Mental health/GHQ-28; dysfunctional parental behavior and stressors in the parenting relationship/parent domain-PSI) | -    |
| Schroeder and Pridham (2006)[23] | Guided Participation (GP)                | Research nurse/exp ert practitioner | 45 minutes, 1 session / 6 weekly | Standard care education | + | + | + | + | + | + | (mother's expectations and intentions | n.a.                                                                                                                                                                                                                                              | n.a. |

| Study                        |                                          |                            |                            |                                                  |         |         |              |                                      |                                                     |                                                        | Outcome                                                        |
|------------------------------|------------------------------------------|----------------------------|----------------------------|--------------------------------------------------|---------|---------|--------------|--------------------------------------|-----------------------------------------------------|--------------------------------------------------------|----------------------------------------------------------------|
| Author(s) [Year]             | Intervention                             | Comparator                 | Duration                   | Age                                              | Setting | Control | Intervention | Comparator                           | Outcome                                             | Outcome                                                | Outcome                                                        |
| Glazebrook et al. (2007)[24] | Parent Baby Interaction Program (PBIP)   | Nurse                      | 1-hour, weekly             | Control phases                                   | +       | +       | +            | -                                    | -                                                   | -                                                      | concerning relationship/ WMRS; relationship competencies/ RCA) |
|                              |                                          |                            |                            |                                                  |         |         |              | (caregiver–child interaction /NCATS) | (stress in the parent-child system/PSI-SF)          | (newborn competence in seven functional domains/N API) |                                                                |
| Borghini et al. (2014)[25]   | Intervention program                     | Nurse & therapist          | Until months corrected age | 4 Without intervention (no interaction guidance) | +       |         | +            | +                                    | -                                                   | +                                                      | n.a.                                                           |
|                              |                                          |                            |                            |                                                  |         |         |              |                                      | (quality of mother–infant interactions/ CARE-Index) | (maternal posttraumatic stress symptoms/ PPQ)          |                                                                |
| Wu et al. (2014)[18]         | Clinic-Based Intervention Program (CBIP) | Nurse & physical therapist | (5 sessions in hospital)   | G1: Home-Based Intervention Program (HBIP)       | +       | +       | +            | +                                    | +                                                   | n.a.                                                   | 24 months+                                                     |
|                              |                                          |                            |                            |                                                  |         |         |              |                                      | (mother–infant interaction/ free-play procedure)    |                                                        | (infant developmental outcomes/ (Bayley-III)                   |

|                                    |                                                              |                                                                             |                                                   | G2: Usual<br>Care<br>Program<br>(UCP) |   |  |   |  |                                       |   |                                                     | -<br><br>(infant<br>behavioral<br>outcomes<br><br>/CBCL) |
|------------------------------------|--------------------------------------------------------------|-----------------------------------------------------------------------------|---------------------------------------------------|---------------------------------------|---|--|---|--|---------------------------------------|---|-----------------------------------------------------|----------------------------------------------------------|
| Hoffenkamp<br>et al.<br>(2015)[26] | hospital-<br>based Video<br>Interaction<br>Guidance<br>(VIG) | certified<br>VIG<br>profession<br>al (nurse<br>and<br>pedagogic<br>workers) | Daily (15<br>minutes/day)                         | Standard<br>hospital<br>care          | + |  | + |  | +                                     | + | -                                                   | n.a.                                                     |
|                                    |                                                              |                                                                             |                                                   |                                       |   |  |   |  | (parental<br>interactive<br>behavior; |   | (parental<br>stress/PSS:NIC<br>U;                   |                                                          |
|                                    |                                                              |                                                                             |                                                   |                                       |   |  |   |  | maternal &<br>paternal<br>bonding/    |   | depressive<br>symptoms/EPD<br>S;                    |                                                          |
|                                    |                                                              |                                                                             |                                                   |                                       |   |  |   |  | PBQ, MBI,<br>YIPTA)                   |   | maternal<br>trauma/TES)                             |                                                          |
| Mörelus et al.<br>(2015)[27]       | Skin-to-Skin<br>Contact<br>(SSC)                             | Parents/<br>nurse                                                           | 24<br>hours/day<br>until<br>hospital<br>discharge | Standard<br>care                      | + |  | + |  | n.a.                                  |   | +                                                   | +                                                        |
|                                    |                                                              |                                                                             |                                                   |                                       |   |  |   |  |                                       |   | (mothers'<br>fathers'<br>parenthood<br>stress/SPSQ) | & (lower<br>salivary<br>cortisol<br>reactivity)          |
|                                    |                                                              |                                                                             |                                                   |                                       |   |  |   |  |                                       |   | -                                                   |                                                          |
|                                    |                                                              |                                                                             |                                                   |                                       |   |  |   |  |                                       |   | (salivary<br>cortisol;                              |                                                          |

| Interventions           |                         |                      |                                                                                     |                          |         |         |              |          |              | Outcomes    |                                                                                                         |
|-------------------------|-------------------------|----------------------|-------------------------------------------------------------------------------------|--------------------------|---------|---------|--------------|----------|--------------|-------------|---------------------------------------------------------------------------------------------------------|
| Author (Year)           | Intervention            | Comparison           | Duration                                                                            | Frequency                | Setting | Control | Intervention | Outcomes | Significance | Effect Size | Notes                                                                                                   |
| Samra et al. (2015)[28] | Skin-to-Skin Care (SSC) | Mother/bedside nurse | 50 minutes (3 times a week)                                                         | Standard care (hold SSC) | +       | +       | +            | n.a.     | +            | n.a.        | mothers' depression/EPDS; parental sensitivity/Ainsworth's sensitivity scale)                           |
| Evans et al. (2017)[29] | Baby Triple P (BTP)     | Facilitator          | 4 sessions (in hospital, 2 hours/session); 4 sessions (at home, 30 minutes/session) | Care as usual (CAU)      | +       | +       | +            | -        | n.a.         | n.a.        | (mother-infant relationship/EA; maternal postnatal attachment /MPAS; maternal responsiveness to infant) |

| cues/MIRI)               |                                                      |                                |                      |                |   |   |   |   |   |                                                                            |                                                                              |                                                                           |
|--------------------------|------------------------------------------------------|--------------------------------|----------------------|----------------|---|---|---|---|---|----------------------------------------------------------------------------|------------------------------------------------------------------------------|---------------------------------------------------------------------------|
| Heo and Oh (2019)[30]    | Parent Participation Improvement Program             | Nurses & mother-father dyads   | 2-week program       | Routine visits | + | + | + | + |   | +                                                                          | +                                                                            | -                                                                         |
|                          |                                                      |                                |                      |                |   |   |   |   |   | (maternal & paternal attachment /MAI)                                      | (parents' partnerships with nurses/Pediatric Nurse-Parent Partnership Scale) | (body weight)                                                             |
| Twohig et al. (2021)[31] | Preterm Infant-Parent Program for Attachment (PIPPA) | Clinician (child psychiatrist) | 3 hours (3 sessions) | Standard care  | + | + | + | + | + | 9 months- (patterns of interactions of infants and caregivers/ CARE-Index) | n.a                                                                          | 12 months+ (infant social, emotional, and regulatory development /ASQ-SE) |

Notes: +/- = significant effect/no significant effect; ASQ-SE = Ages and Stages Questionnaire, Social-Emotional Development version; Bayley-II = Bayley Scales of Infant and Toddler Development, 3rd ed.; CARE = The Child Adult Relationship Evaluation; CBCL = Child Behavior Checklist for Ages 1.5 to 5; EA = Emotional Availability Scale; EPDS = Edinburgh Postnatal Depression Scale; GHQ-28 = General Health Questionnaire; MABS = Mother and Baby Scale; MAI = Maternal Attachment Inventory; MBI = My Baby and I Questionnaire; MDI = Mental Development Index of the BSID-II (Bayley Scales of Infant Development, 2nd ed.); MIIS = Maternal-Infant Interaction Scale; MIRI = Maternal Infant Responsiveness Instrument; MPAS = Maternal Postnatal Attachment Scale; n.a. = not assessed or not reported; NAPI = Neurobehavioral Assessment of the Preterm Infant; NCAFS = Nursing Child Assessment Feeding Scale; NCATS = Nursing Child Assessment Teaching Scale; PBQ = Postpartum Bonding Questionnaire; POMS = Profile of Mood States; PPQ = Perinatal Posttraumatic Stress Disorder Questionnaire; PSI = Parenting Stress Index; PSI-SF = Parenting Stress Index, short form; PSS:NICU = Parental Stressor Scale: Neonatal Intensive Care Unit; RCA = Relationship Competencies Assessment; SPSQ = The Swedish Parenthood Stress Questionnaire; STAI = State-Trait, Anxiety Inventory; TES = Traumatic Event Scale; WMRS = Working Model Relationship Score; YIPTA = Yale Inventory of Parental Thoughts and Actions;

Coding categories for parent education intervention components [31]: E1 = information given: includes information that is generic (e.g., written or audio or video recorded), individualized to the family (e.g., written or verbal), and/or includes discussion with the parent; E2 = Guided observation: includes parent observations or demonstrations of an activity with the infant; E3 = Active involvement: includes parent involvement in active practical experiences, modeling and guided self-evaluation or self-reflecting education (e.g., video feedback); Support = includes parent/family support sessions and/or counseling/consulting to support parents (e.g., discussions tailored to a parent's circumstances and addressing any socio-emotional/psychological concerns).



Table S2. Synthesis of results with the 8 variables (N = 10).

| First Author<br>(Year)          | Attachment/<br>bonding | Mother-infant<br>interactions | Maternal<br>anxiety | Parental<br>environmental<br>stress | Maternal<br>traumatic<br>stress | Maternal<br>depression | Infant weight<br>growth | Infant<br>development |
|---------------------------------|------------------------|-------------------------------|---------------------|-------------------------------------|---------------------------------|------------------------|-------------------------|-----------------------|
| Melnyk et al.<br>(2001)[19]     |                        |                               | +                   | +                                   |                                 |                        |                         | +                     |
| Ramanathan et<br>al. (2001)[20] |                        |                               |                     |                                     |                                 |                        | +                       |                       |
| Miles et al.<br>(2006)[22]      |                        |                               | +                   |                                     |                                 | +                      |                         |                       |
| Borghini et al.<br>(2014)[25]   | +                      | +                             |                     | +                                   | +                               |                        |                         |                       |
| Wu et al.<br>(2014)[18]         |                        |                               |                     |                                     |                                 |                        |                         | +                     |
| Hoffenkamp et<br>al. (2015)[26] |                        |                               |                     | +                                   | +                               | +                      |                         |                       |
| Mörelus et al.<br>(2015)[27]    |                        |                               |                     |                                     |                                 |                        |                         |                       |
| Samra et al.<br>(2015)[28]      |                        |                               |                     | +                                   |                                 |                        |                         |                       |
| Evans et al.<br>(2017)[29]      |                        |                               |                     |                                     |                                 |                        |                         |                       |

Heo and Oh  
(2019)[30]

+

Twohig et al.  
(2021)[31]

+

+

+

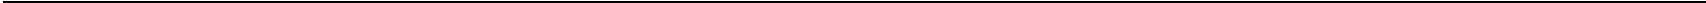

Figure S1. Forest plot of comparisons

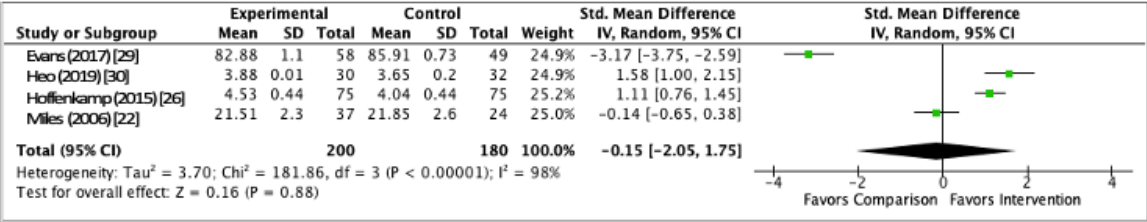

1. Outcome: Parent-to-infant attachment or parental bonding

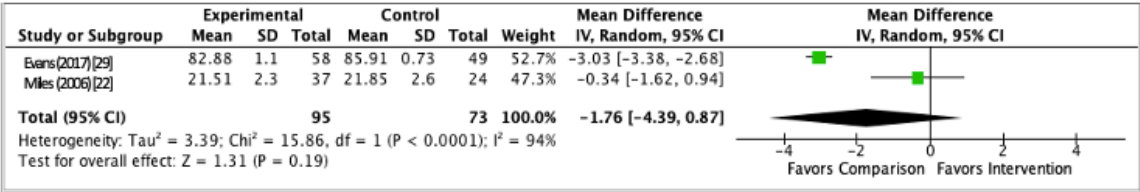

1-1. Outcome: Maternal postnatal attachment scale (sensitivity analysis)

Miles et al. (2005)[22]: Parent-infant interaction

Hoffenkamp et al. (2015)[26]: Parent-infant interaction; parent education (information given and active involvement)

Evans et al. (2017)[29]: Parent-infant interaction; support

Heo and Oh (2019)[30]: Parent-infant interaction; parent education (information given, guided observations, and active involvement)

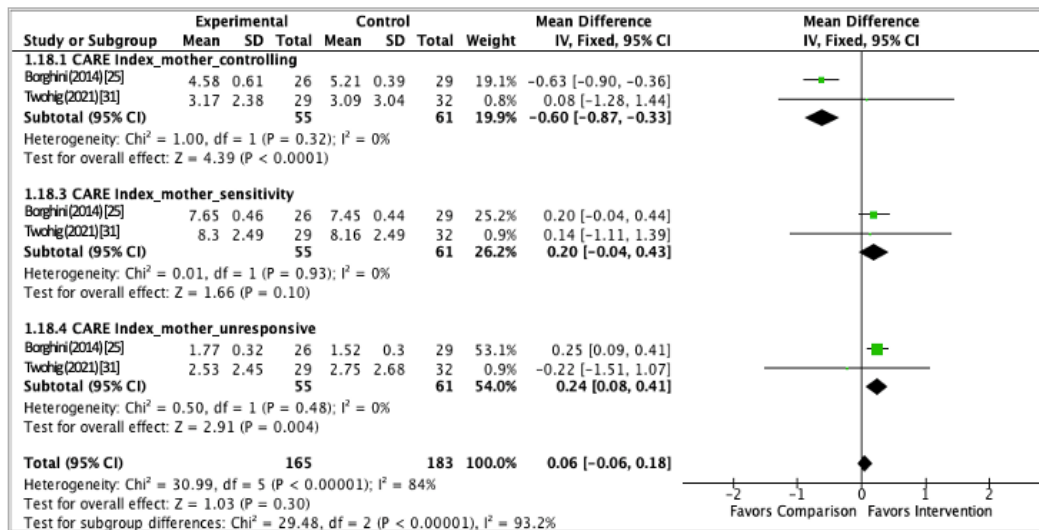

## 2-1. Outcome: Quality of mother-infant interactions (mother's interactive behavior)

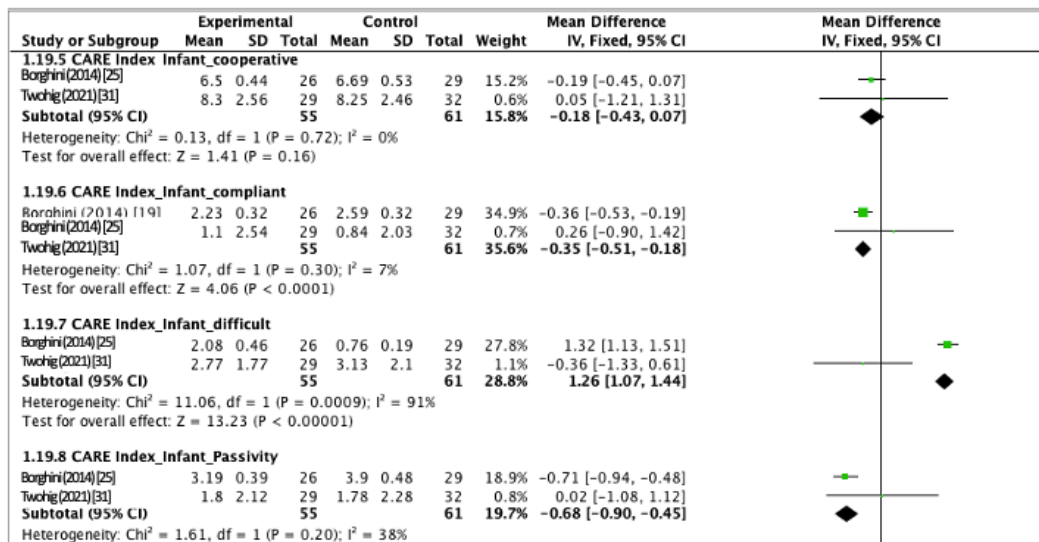

## 2-2. Outcome: Quality of mother-infant interactions (child's interactive behavior)

Borghini et al. (2014)[25]: Parent-infant interaction; parent education (guided observation and active involvement)

Twohig et al. (2021)[31]: Parent-infant interaction; parent education (information given, guided observations, and active involvement); support

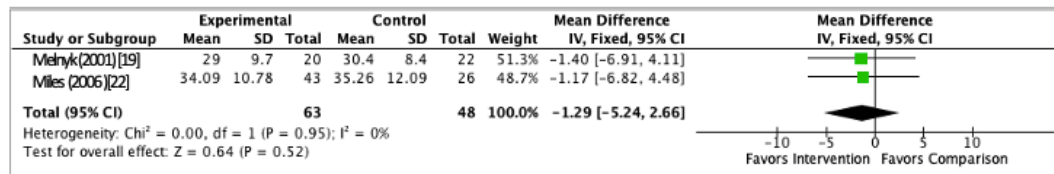

### 3. Outcome: Maternal anxiety levels

Melnyk et al. (2001)[19]: Parent-infant interaction; parent education (information given, active involvement)

Miles et al. (2006)[22]: Parent-infant interaction

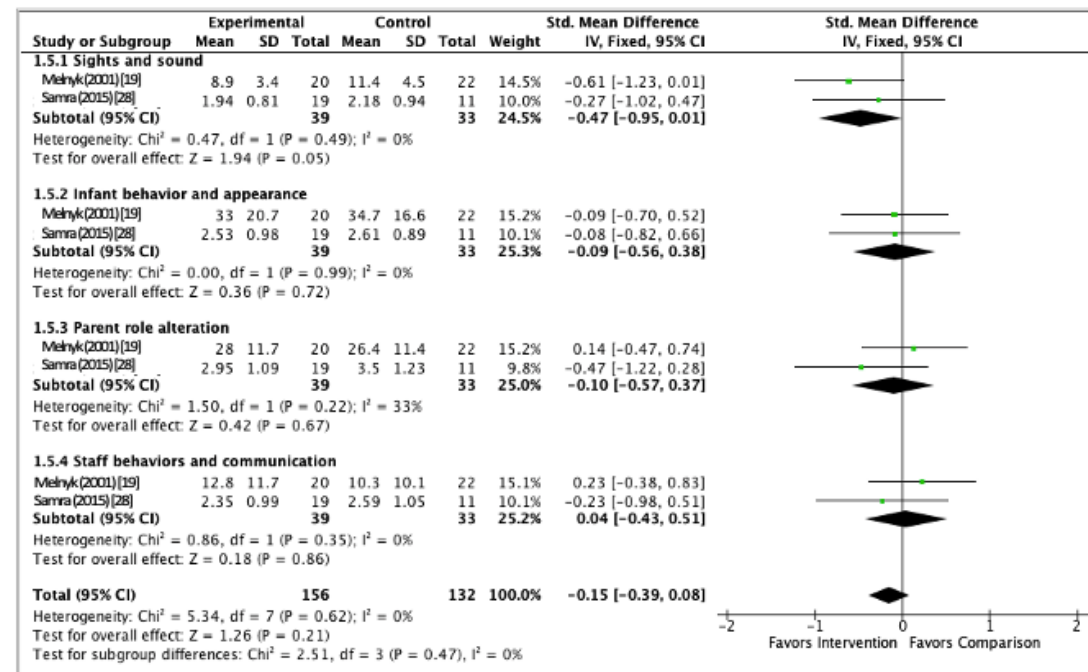

4. Outcome: Parental environmental stress

Melnyk et al. (2001)[19]: Parent-infant interaction; parent education (information given, active involvement)

Samra et al. (2015)[28]: Parent-infant interaction; parent education (information given)

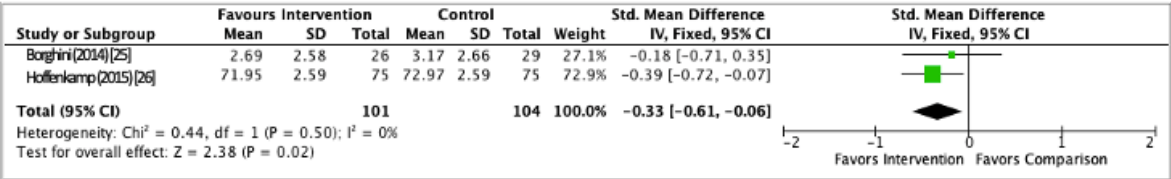

5. Outcome: Maternal traumatic stress

Borghini et al. (2014)[25]: Parent-infant interaction; parent education (guided observation and active involvement)

Hoffenkamp et al. (2015)[26]: Parent-infant interaction; parent education (information given and active involvement)

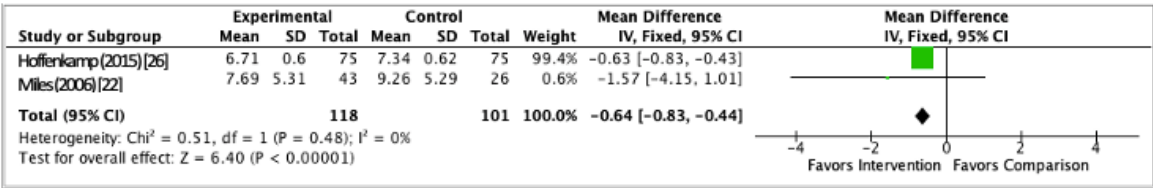

6. Outcome: Maternal depression

Miles et al. (2006)[26]: Parent-infant interaction

Hoffenkamp et al. (2015)[22]: Parent-infant interaction; parent education (information given and active involvement)

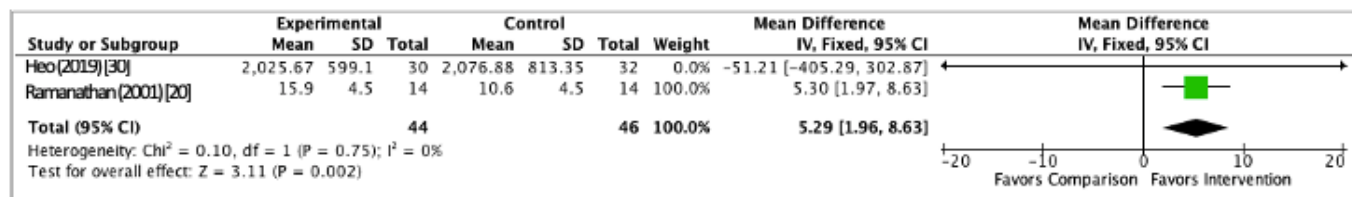

## 7. Outcome: Infant growth (birth weight)

Heo and Oh (2019)[30]: Parent-infant interaction; parent education (information given, guided observations, and active involvement)

Ramanathan et al. (2001)[20]: Parent-infant interaction

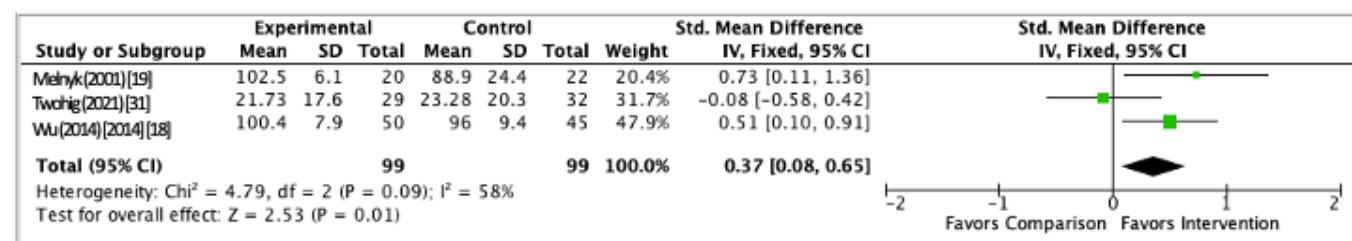

## 8. Outcome: Infant development

Melnik et al. (2001)[19]: Parent-infant interaction; parent education (information given and active involvement)

Twohig et al. (2021)[31]: Parent-infant interaction; parent education (information given, guided observations, and active involvement); support

Wu et al. (2014)[18]: Parent-infant interaction; parent education (information given); support

**Figure S1.** Forest plot of comparisons
